# Supplementary material for: Probing the self-assembly dynamics and internal structure of amphiphilic hyaluronic acid conjugates by fluorescence spectroscopy and molecular dynamics simulations
Source: Royal Society of Chemistry journal article supplement (doi:10.1039/c8sm00908b), 2018-01-01
Supplement: c8sm00908b1.pdf [file c8sm00908b1.pdf]

## Supporting Information

# Hydrophobic domains of amphiphilic polymeric nanoparticles: Probing self-assembly dynamics and interior structure by fluorescence spectroscopy and molecular dynamics simulations

*Denis Svechkarev,<sup>1</sup> Alexander Kyrychenko,<sup>2</sup> William M. Payne,<sup>1</sup> Aaron M. Moks<sup>1,3,4\*</sup>*

<sup>1</sup> Department of Pharmaceutical Sciences, University of Nebraska Medical Center  
Omaha, NE 68198-6805, United States

<sup>2</sup> Institute for Chemistry, V. N. Karazin Kharkiv National University  
4 Svobody Square, 61022 Kharkiv, Ukraine

<sup>3</sup> Fred and Pamela Buffett Cancer Center, University of Nebraska Medical Center,  
Omaha, NE 68198-6805, United States

<sup>4</sup> Department of Biochemistry and Molecular Biology, University of Nebraska Medical Center,  
Omaha, NE 68198-6805, United States

## 1. $^1\text{H}$ NMR spectra of HA amphiphiles

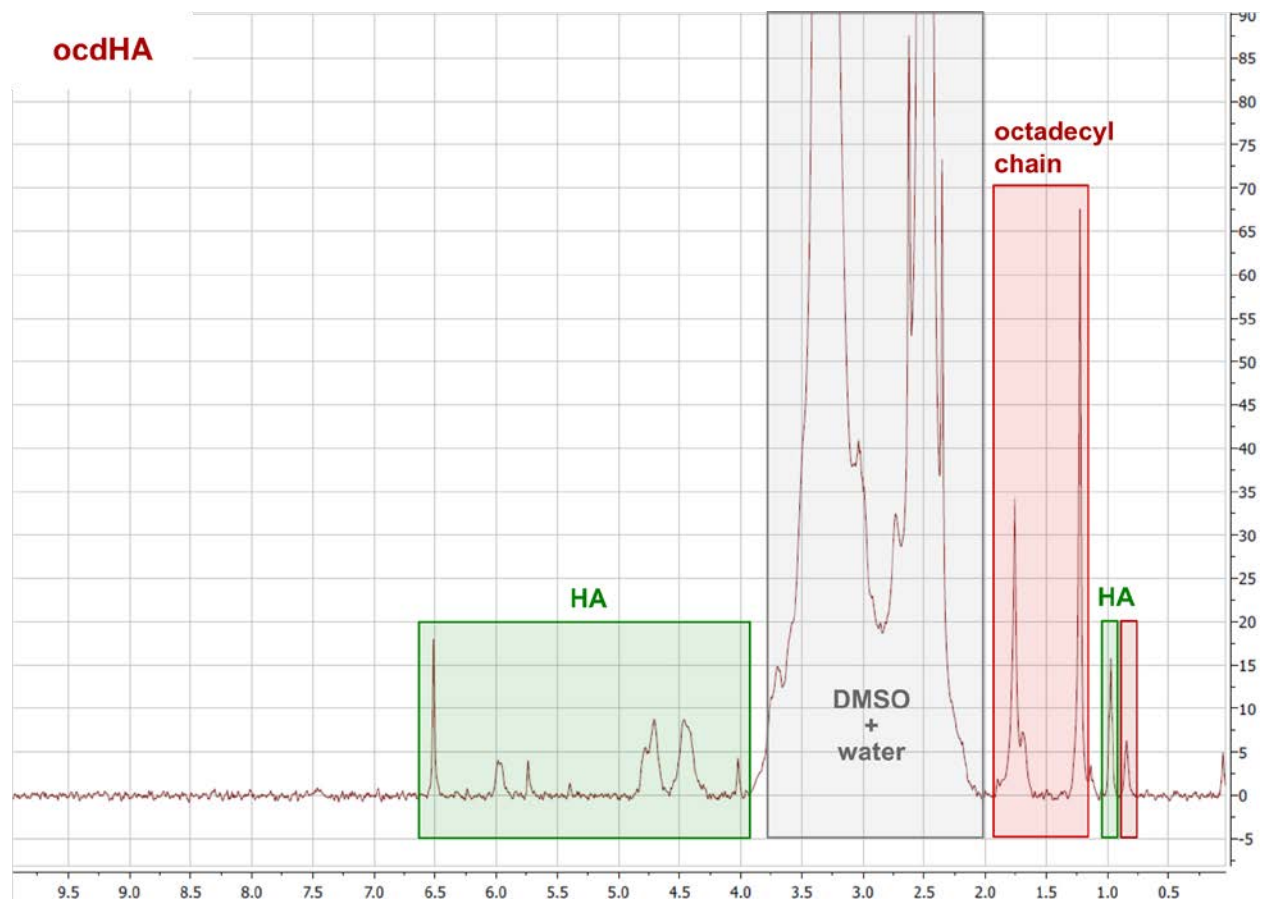

**Figure S1.**  $^1\text{H}$  NMR spectrum of ocdHA.

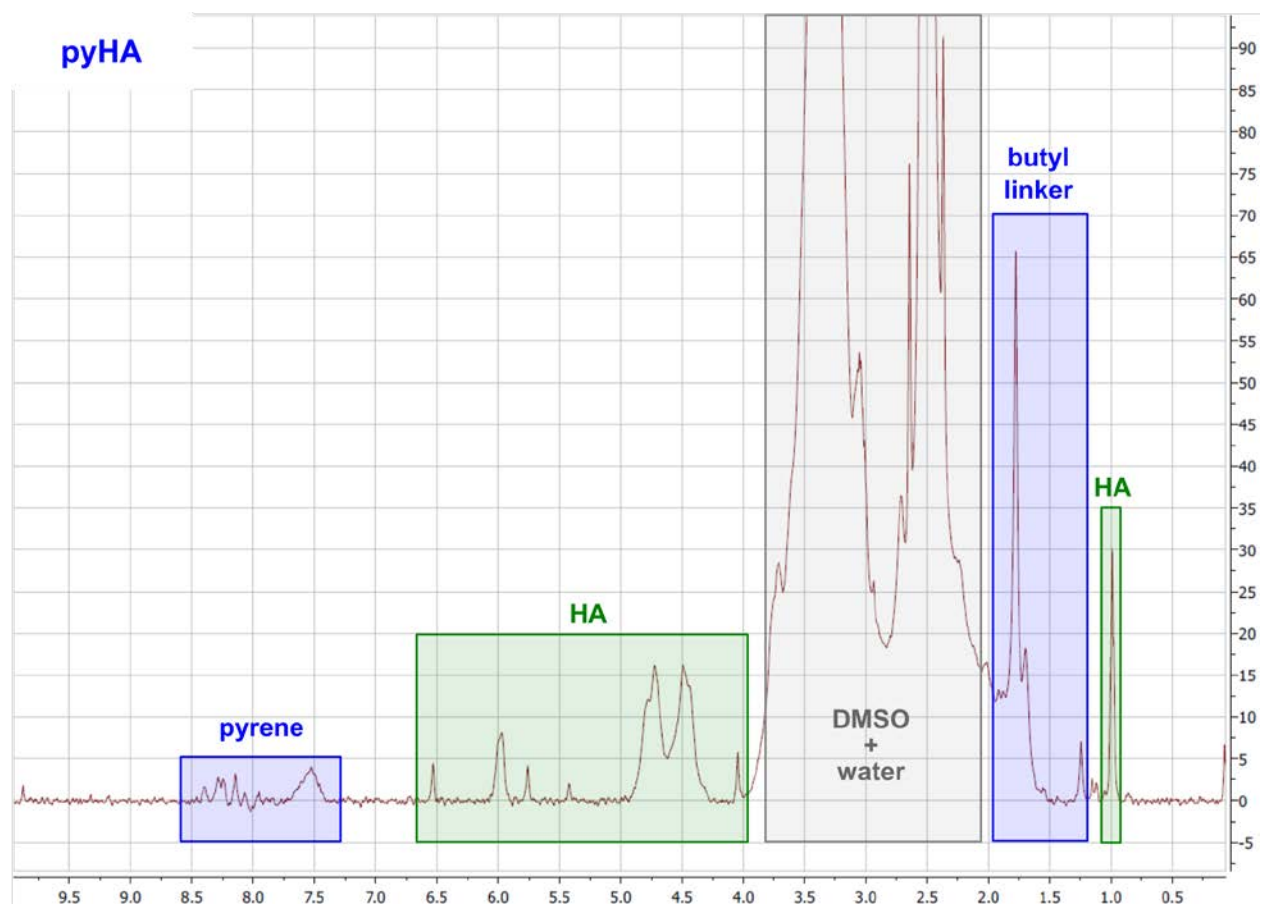

**Figure S2.**  $^1\text{H}$  NMR spectrum of pyHA.

## 2. Simulations of ocdHA and pyHA self-assembly

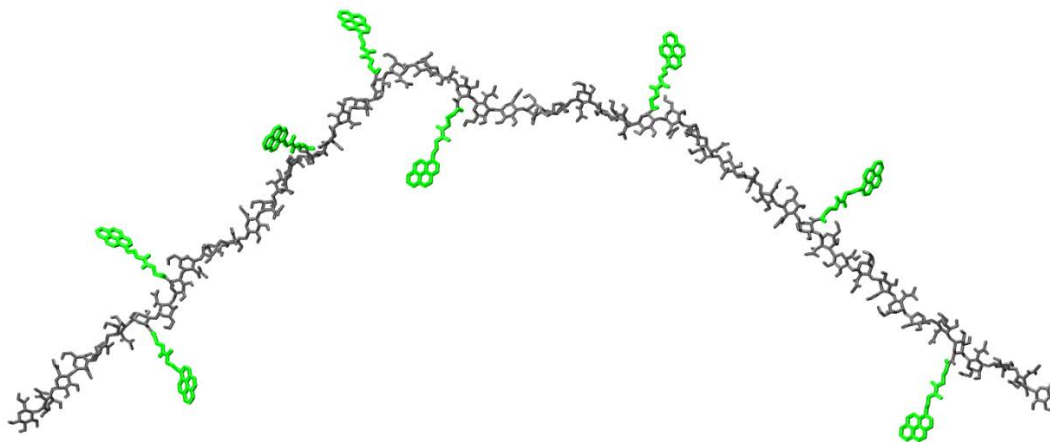

**Figure S3.** Structure of 10 kDa pyHA. The pyrenyl-butamide fragments located at the randomly selected positions are shown in green.

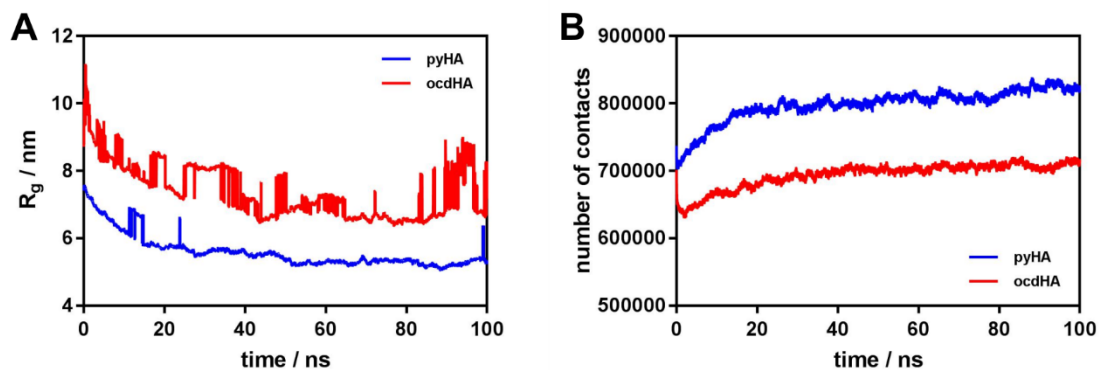

**Figure S4.** Dynamics of radius of gyration (**A**) and polymer-polymer contacts (**B**) during 100 ns of MD simulations of the system consisting of 22 molecules of modified 10 kDa HA.

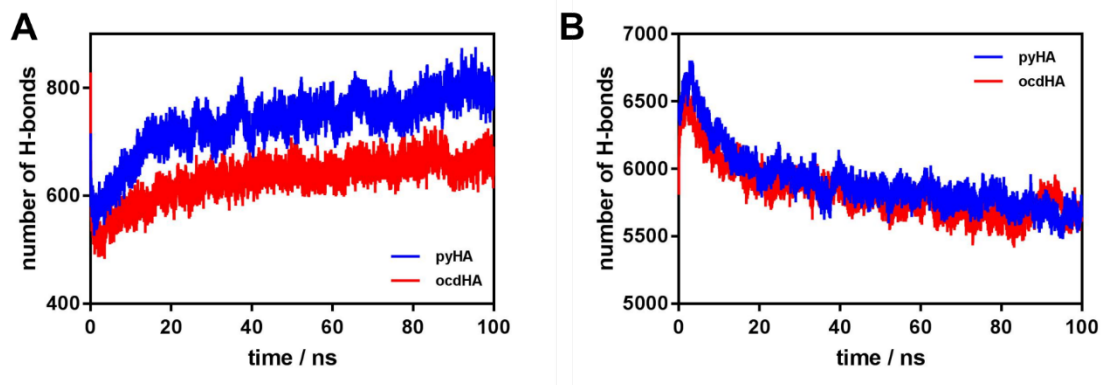

**Figure S5.** Dynamics of polymer-polymer (A) and polymer-water (B) hydrogen bonds during 100 ns of MD simulations of the system consisting of 22 molecules of modified 10 kDa HA.

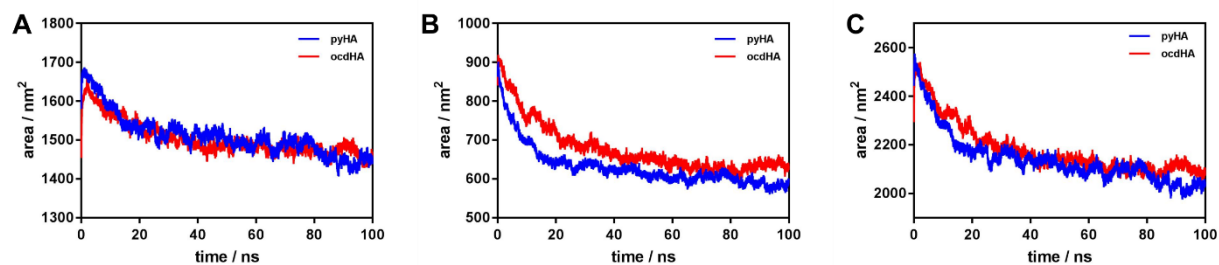

**Figure S6.** Dynamics of hydrophilic (A), hydrophobic (B) and total (C) solvent-accessible surface during 100 ns of MD simulations of the system consisting of 22 molecules of modified 10 kDa HA.

### 3. Spectral properties of the dyes

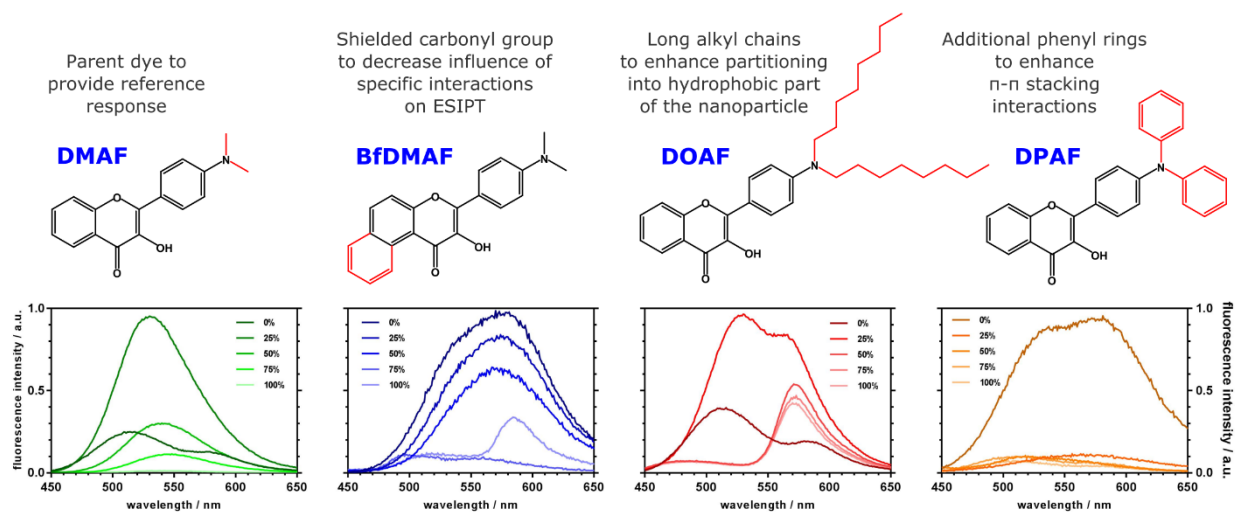

**Figure S7.** Structures of the dyes used for probing the interior of modified HA nanoparticles (top) and their fluorescence spectra in DMSO-water binary systems (bottom, water content is shown in the legends).

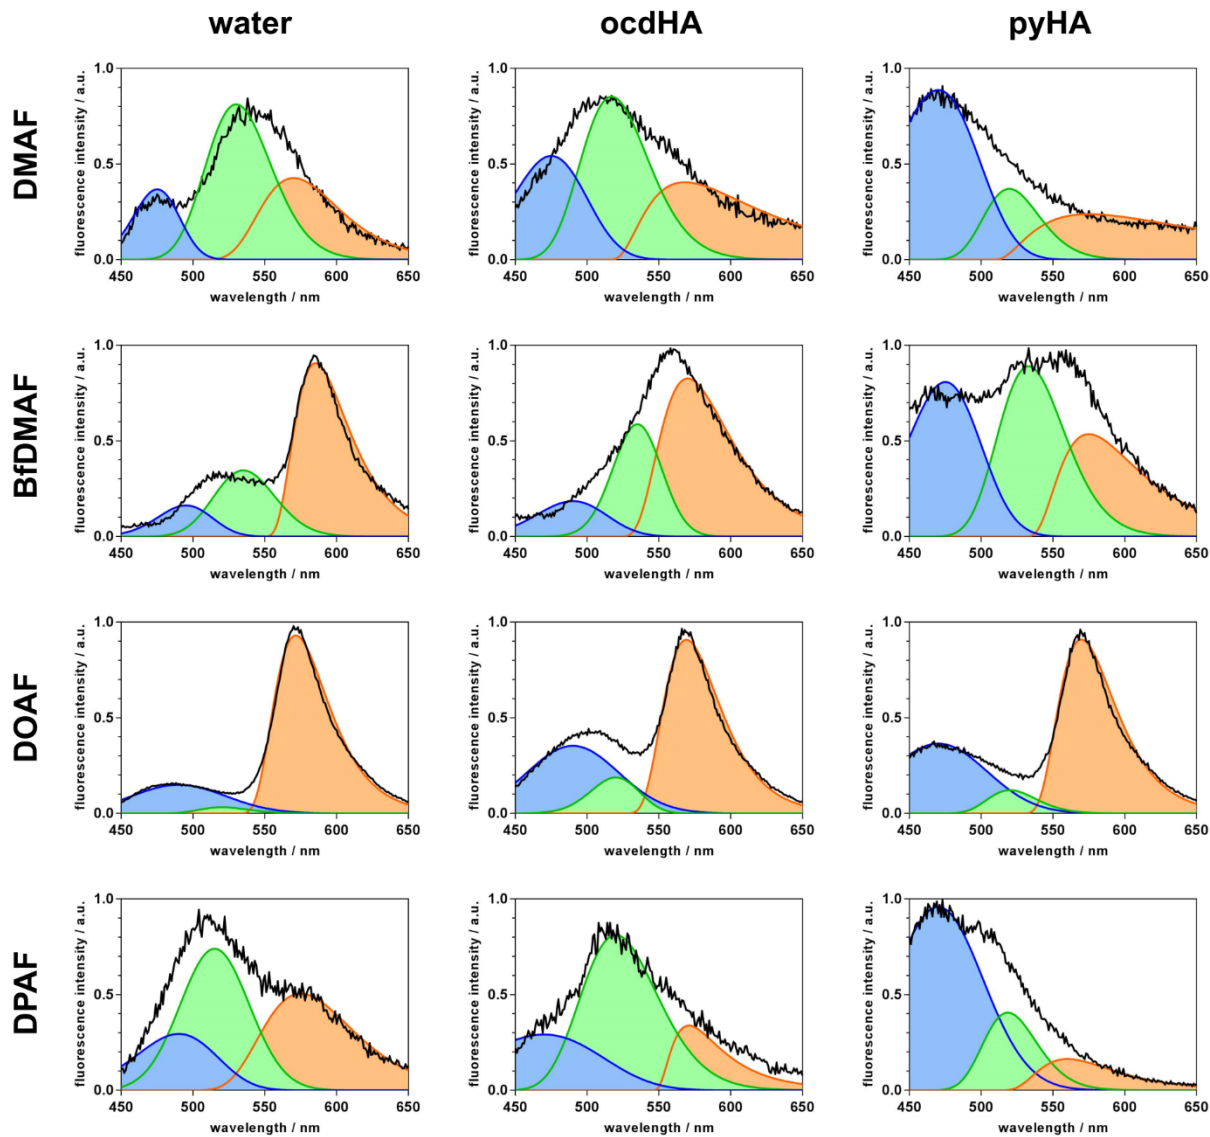

**Figure S8.** Spectral deconvolution of the emission spectra represented in the Figure 6. Calculated emissions for individual spectral components are colored in blue (normal form, N\*), green (anionic form, A\*), and orange (phototautomeric form, T\*).

#### 4. Simulations of dye-polymer systems

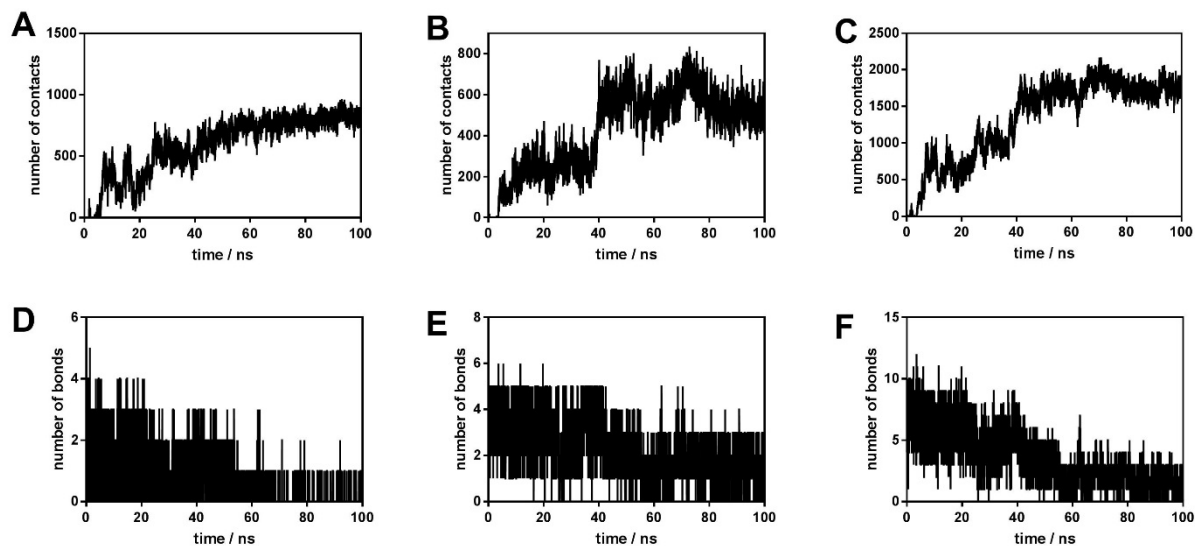

**Figure S9.** Dynamics of hydrophilic (A), hydrophobic (B), and total (C) dye-polymer contacts, hydroxyl-water (D), carbonyl-water (E), and total (F) dye-water hydrogen bonds during 100 ns of MD simulations of the system consisting of 2 molecules of DOAF and 4 molecules of ocdHA.

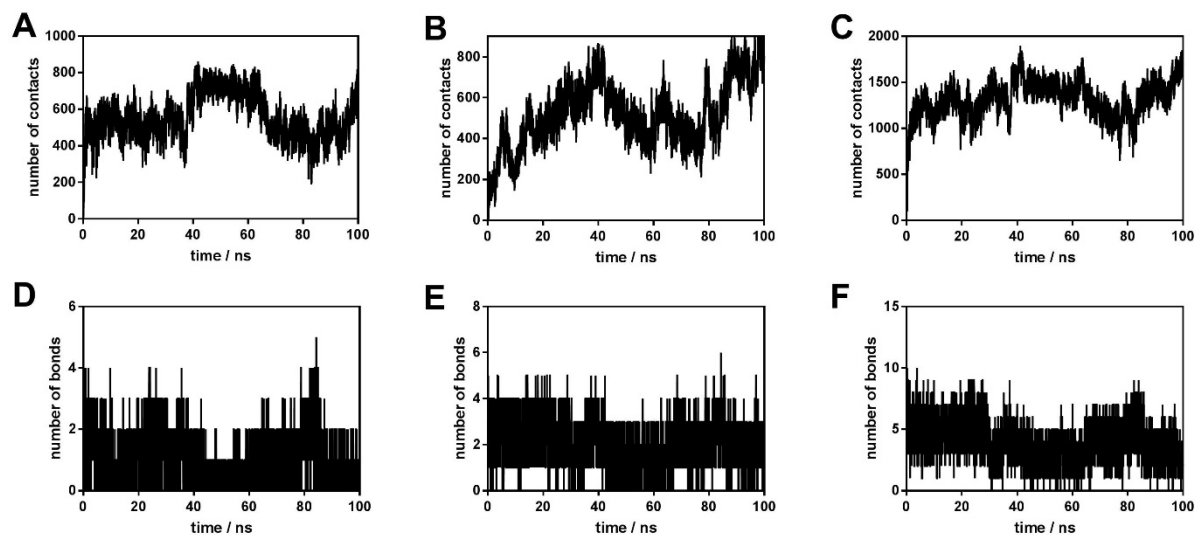

**Figure S10.** Dynamics of hydrophilic (A), hydrophobic (B), and total (C) dye-polymer contacts, hydroxyl-water (D), carbonyl-water (E), and total (F) dye-water hydrogen bonds during 100 ns of MD simulations of the system consisting of 2 molecules of DPAF and 4 molecules of ocdHA.



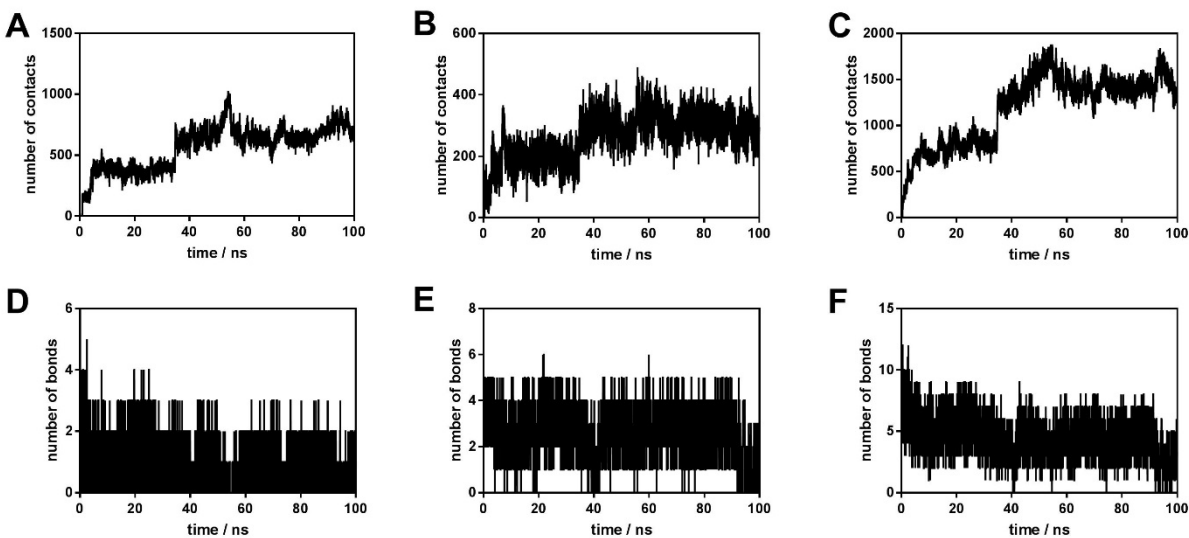

**Figure S11.** Dynamics of hydrophilic (A), hydrophobic (B), and total (C) dye-polymer contacts, hydroxyl-water (D), carbonyl-water (E), and total (F) dye-water hydrogen bonds during 100 ns of MD simulations of the system consisting of 2 molecules of DOAF and 4 molecules of pyHA.

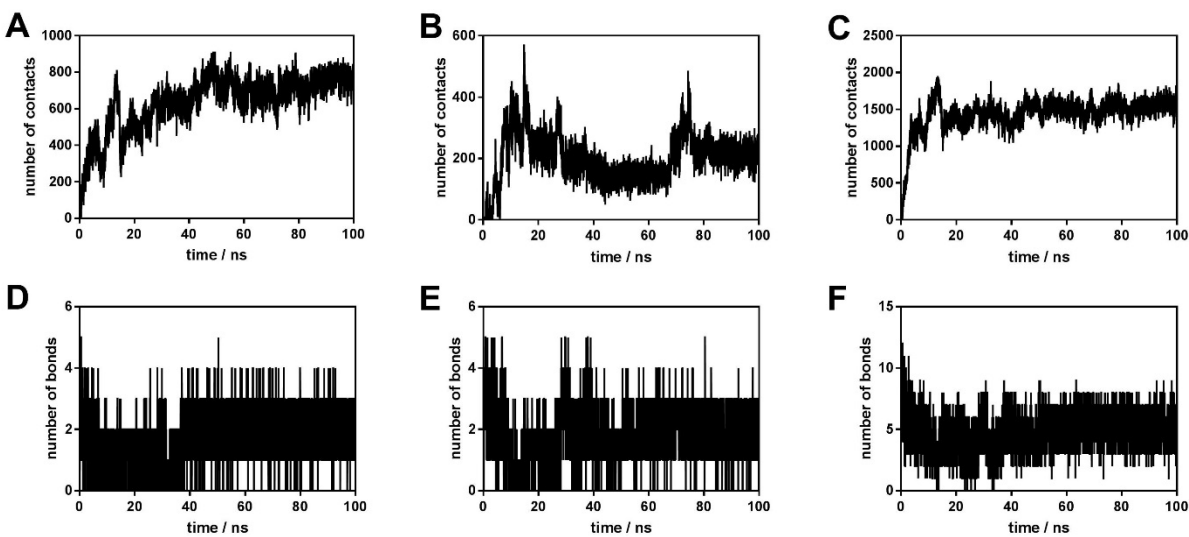

**Figure S12.** Dynamics of hydrophilic (A), hydrophobic (B), and total (C) dye-polymer contacts, hydroxyl-water (D), carbonyl-water (E), and total (F) dye-water hydrogen bonds during 100 ns of MD simulations of the system consisting of 2 molecules of DPAF and 4 molecules of pyHA.
